# Supplementary material
Source: PubMed Central journal article supplement (PMC5248995)
Supplement: DB160641SupplementaryData.pdf [file DB160641SupplementaryData.pdf]

SUPPLEMENTARY DATA

**Supplementary Figure S1. Gastrin+ cells originate from beta cells in mice**

- A. Gastrin+ contain varying amounts of insulin.
- B. Gastrin+ cells contain pro-insulin, indicating co-expression of gastrin and insulin (rather than gastrin expression in cells that retain insulin from past expression).
- C. Gastrin+ cells express Pdx1 at levels similar to adjacent beta cells.
- D. Examples of lineage-traced beta cells that express gastrin and are either insulin positive (left) or negative (right).
- E. The vast majority of GFP labeled gastrin cells are positive for insulin.
- F. Co-staining for insulin, gastrin and cocktail of antibodies against glucagon and somatostatin, in a diabetic db/db mouse. Gastrin is not expressed in alpha and delta cells.

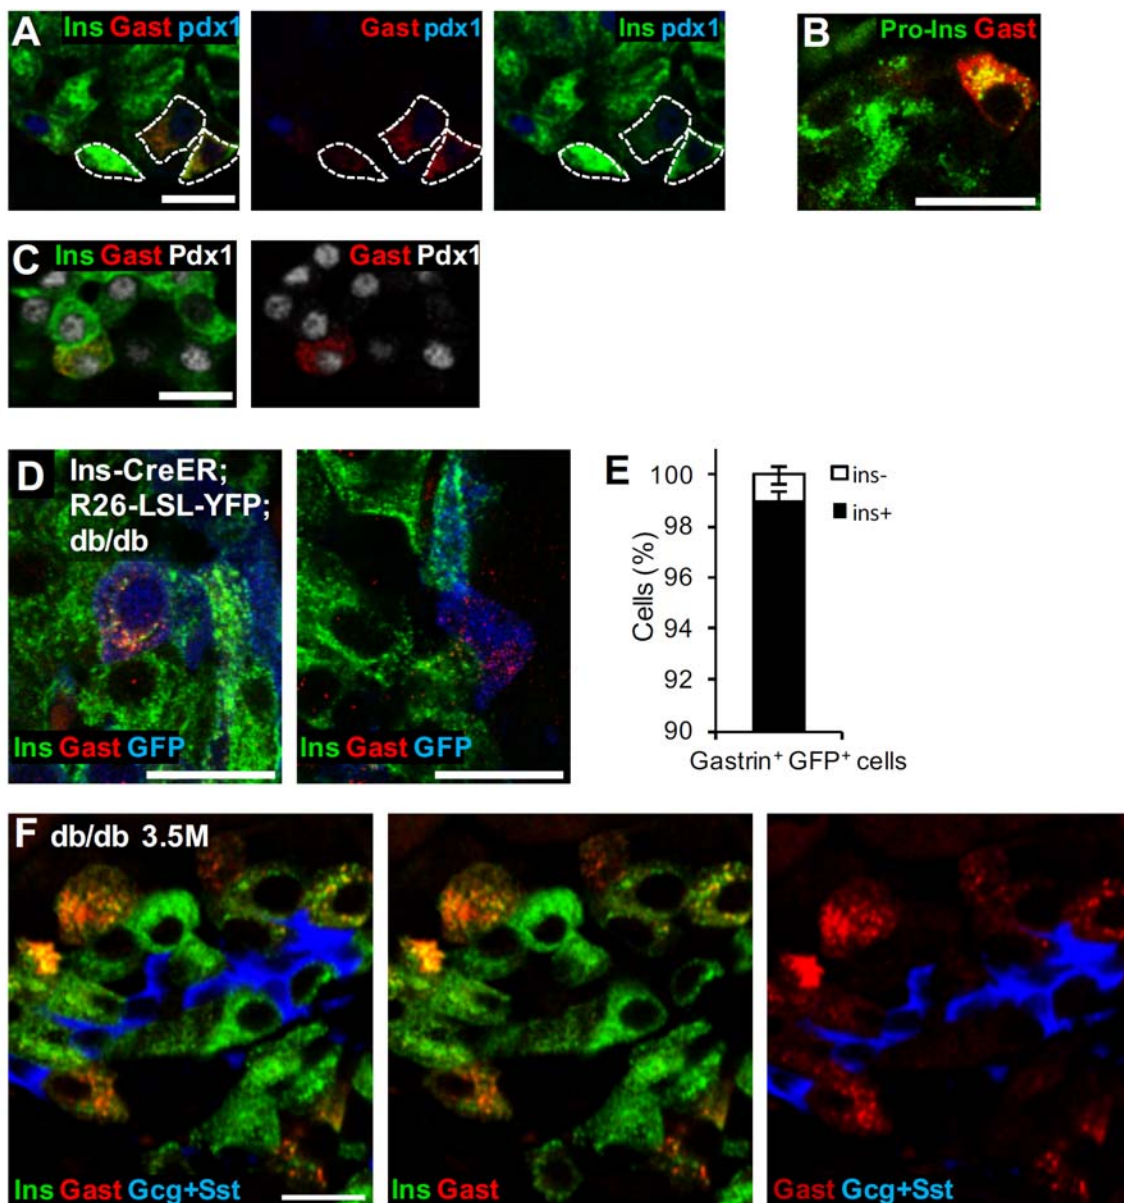

SUPPLEMENTARY DATA

**Supplementary Figure S2.** No evidence for expression of NeuroG3 (A) Nanog (B) and Oct4 (C) mRNA in various models of gastrin expression: high glucose treated islets, diabetic db/db mice, Akita mice and ICR mice treated with insulin receptor blocker.

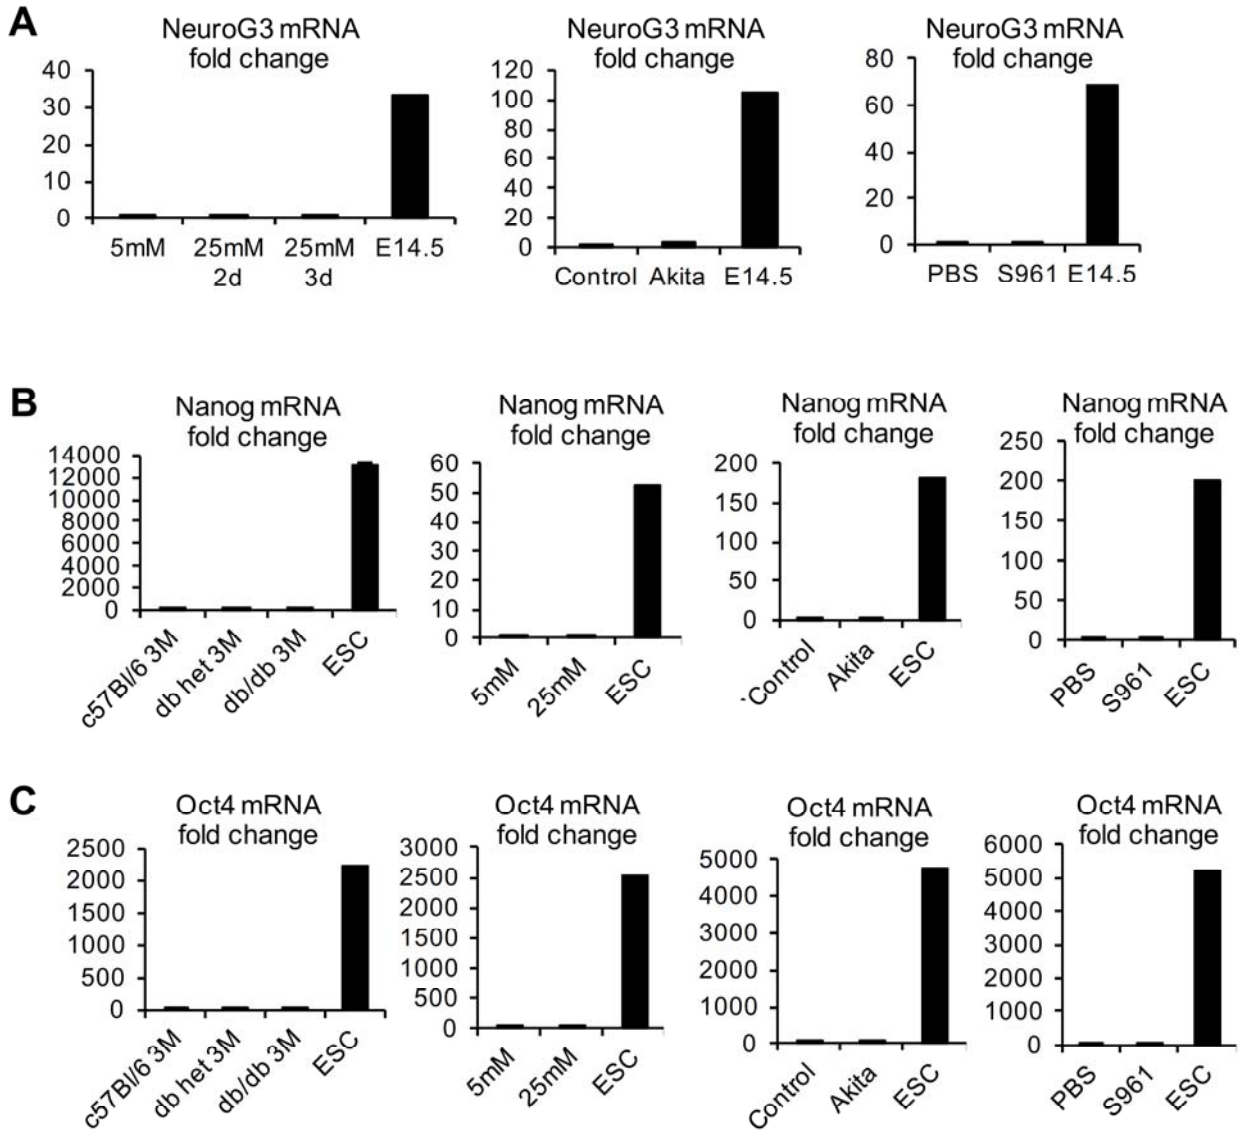

SUPPLEMENTARY DATA

**Supplementary Table S1.** Characterization of type 2 diabetes and control patients.

| Case    | Age/Sex | BMI  | T2DM | duration T2DM | Case of death           | Last/highest glycemia* | Diabetes-related therapy     | Gastrin (%) |
|---------|---------|------|------|---------------|-------------------------|------------------------|------------------------------|-------------|
| A00/169 | 77/M    | 23.1 | No   | /             | Bronchopneumonia        | 124/180                |                              | 0           |
| A02/170 | 85/M    | 27.0 | No   | /             | Cardiovascular accident | 100/103                |                              | 0           |
| A04/241 | 75/M    | 26.5 | No   | /             | Unknown                 | 159/159                |                              | 0           |
| A01/200 | 75/M    | 27.1 | Yes  | 2 years       | Respiratory failure     | 167/308                | Diet,SU,insulin              | 3.23        |
| A02/010 | 82/M    | 28.4 | Yes  | 12 years      | Heart failure           | 130/230                | Diet, metformin, SU, insulin | 2.17        |
| A04/409 | 73/M    | 23.8 | Yes  | 6 years       | Unknown                 | 180/380                | SU, insulin                  | 2.44        |
